# Supplementary material for: A transcriptome analysis focusing on inflammation-related genes of grass carp intestines following infection with Aeromonas hydrophila
Source: PubMed Central journal article supplement (PMC5240114; doi:10.1038/srep40777), 2017-01-17
Supplement: srep40777-s1.pdf [file srep40777-s1.pdf]

# **A transcriptome analysis focusing on inflammation-related genes of grass carp intestines following infection with**

## ***Aeromonas hydrophila***

Xuehong Song<sup>1,#</sup>, Xiaolong Hu<sup>1,2,#</sup>, Bingyao Sun<sup>1</sup>, Yunxuan Bo<sup>1</sup>, Kang Wu<sup>1</sup>, Lanying Xiao<sup>1</sup>, Chengliang Gong<sup>1,2,\*</sup>

<sup>1</sup>School of Biology and Basic Medical Sciences, Soochow University, Suzhou 215123, China

<sup>2</sup>National Engineering Laboratory for Modern Silk, Soochow University, Suzhou 215123, China

L

\* Corresponding author: gongcl@suda.edu.cn

### **List of Supplementary Information (Supplementary Tables and Figures)**

Table S1. Summary of sequencing data generated for grass carp transcriptome.

Table S2. Summary of *de novo* grass carp transcriptome assembly results.

Table S3. KEGG pathway analysis of the unigenes identified in the grass carp transcriptome.

Table S4. Summary of the RNA-seq alignment statistics in the two libraries.

Table S5. Gene ontology (GO) classification of the significantly differentially expressed genes.

Table S6. The significantly enriched KEGG pathways affected by *A. hydrophila* infection.

Table S7. The sequences of oligonucleotide primer pairs used in quantitative real-time PCR (qPCR).

Figure S1. The size distribution of assembled contigs (A) and unigenes (B) from the grass carp transcriptome.

Figure S2. Distribution of total clean tags from DGE libraries.

Figure S3. The significantly DEG-enriched KEGG phagosome pathway.

Figure S4. The significantly DEG-enriched KEGG lysosome pathway.

Figure S5. The significantly DEG-enriched KEGG rheumatoid arthritis pathway.

Figure S6. The significantly DEG-enriched KEGG antigen processing and presentation pathway.

Figure S7. The significantly DEG-enriched KEGG oxidative phosphorylation pathway.

Figure S8. The significantly DEG-enriched KEGG type I diabetes mellitus pathway.

Figure S9. The significantly DEG-enriched KEGG ribosome pathway.

Table S1. Summary of sequencing data generated for grass carp transcriptome.

| Total clean reads | Total clean nucleotides (nt) | Q20 percentage | N percentage | GC percentage |
|-------------------|------------------------------|----------------|--------------|---------------|
| 45,867,282        | 4,128,055,380                | 95.32%         | 0.00%        | 46.61%        |

Table S2. Summary of *de novo* grass carp transcriptome assembly results.

| Sequence type | Total number | Total length (nt) | Mean length (nt) | N50 | Total consensus sequences | Distinct clusters | Distinct singletons |
|---------------|--------------|-------------------|------------------|-----|---------------------------|-------------------|---------------------|
| Contig        | 120,964      | 44,621,250        | 369              | 614 | -                         | -                 | -                   |
| Unigene       | 67,413       | 44,810,194        | 665              | 983 | 67,413                    | 11,623            | 55,790              |

Table S3. KEGG pathway analysis of the unigenes identified in the grass carp transcriptome.

| #  | Pathway                                                 | number of unigenes with pathway annotation<br>(28386 in total) | Pathway ID |
|----|---------------------------------------------------------|----------------------------------------------------------------|------------|
| 1  | <a href="#">Metabolic pathways</a>                      | 2946 (10.38%)                                                  | ko01100    |
| 2  | <a href="#">Pathways in cancer</a>                      | 1388 (4.89%)                                                   | ko05200    |
| 3  | <a href="#">Regulation of actin cytoskeleton</a>        | 1140 (4.02%)                                                   | ko04810    |
| 4  | <a href="#">Focal adhesion</a>                          | 1126 (3.97%)                                                   | ko04510    |
| 5  | <a href="#">HTLV-I infection</a>                        | 983 (3.46%)                                                    | ko05166    |
| 6  | <a href="#">Endocytosis</a>                             | 921 (3.24%)                                                    | ko04144    |
| 7  | <a href="#">MAPK signaling pathway</a>                  | 894 (3.15%)                                                    | ko04010    |
| 8  | <a href="#">Influenza A</a>                             | 879 (3.1%)                                                     | ko05164    |
| 9  | <a href="#">Epstein-Barr virus infection</a>            | 872 (3.07%)                                                    | ko05169    |
| 10 | <a href="#">Herpes simplex infection</a>                | 844 (2.97%)                                                    | ko05168    |
| 11 | <a href="#">Tight junction</a>                          | 810 (2.85%)                                                    | ko04530    |
| 12 | <a href="#">Transcriptional misregulation in cancer</a> | 782 (2.75%)                                                    | ko05202    |
| 13 | <a href="#">Tuberculosis</a>                            | 744 (2.62%)                                                    | ko05152    |
| 14 | <a href="#">Vascular smooth muscle contraction</a>      | 679 (2.39%)                                                    | ko04270    |
| 15 | <a href="#">Chemokine signaling pathway</a>             | 661 (2.33%)                                                    | ko04062    |
| 16 | <a href="#">RNA transport</a>                           | 649 (2.29%)                                                    | ko03013    |
| 17 | <a href="#">Amoebiasis</a>                              | 642 (2.26%)                                                    | ko05146    |
| 18 | <a href="#">Phagosome</a>                               | 641 (2.26%)                                                    | ko04145    |
| 19 | <a href="#">Axon guidance</a>                           | 611 (2.15%)                                                    | ko04360    |
| 20 | <a href="#">Purine metabolism</a>                       | 606 (2.13%)                                                    | ko00230    |
| 21 | <a href="#">Adherens junction</a>                       | 599 (2.11%)                                                    | ko04520    |
| 22 | <a href="#">Leukocyte transendothelial migration</a>    | 595 (2.1%)                                                     | ko04670    |
| 23 | <a href="#">Wnt signaling pathway</a>                   | 593 (2.09%)                                                    | ko04310    |
| 24 | <a href="#">Insulin signaling pathway</a>               | 591 (2.08%)                                                    | ko04910    |
| 25 | <a href="#">Spliceosome</a>                             | 542 (1.91%)                                                    | ko03040    |
| 26 | <a href="#">Huntington's disease</a>                    | 542 (1.91%)                                                    | ko05016    |

|    |                                                             |             |         |
|----|-------------------------------------------------------------|-------------|---------|
| 27 | <a href="#">Calcium signaling pathway</a>                   | 530 (1.87%) | ko04020 |
| 28 | <a href="#">Fc gamma R-mediated phagocytosis</a>            | 525 (1.85%) | ko04666 |
| 29 | <a href="#">Toxoplasmosis</a>                               | 516 (1.82%) | ko05145 |
| 30 | <a href="#">Protein processing in endoplasmic reticulum</a> | 516 (1.82%) | ko04141 |
| 31 | <a href="#">Ubiquitin mediated proteolysis</a>              | 513 (1.81%) | ko04120 |
| 32 | <a href="#">Dilated cardiomyopathy</a>                      | 512 (1.8%)  | ko05414 |
| 33 | <a href="#">Cell adhesion molecules (CAMs)</a>              | 504 (1.78%) | ko04514 |
| 34 | <a href="#">Viral myocarditis</a>                           | 493 (1.74%) | ko05416 |
| 35 | <a href="#">Salmonella infection</a>                        | 485 (1.71%) | ko05132 |
| 36 | <a href="#">ECM-receptor interaction</a>                    | 480 (1.69%) | ko04512 |
| 37 | <a href="#">Neurotrophin signaling pathway</a>              | 477 (1.68%) | ko04722 |
| 38 | <a href="#">Hypertrophic cardiomyopathy (HCM)</a>           | 468 (1.65%) | ko05410 |
| 39 | <a href="#">Alzheimer's disease</a>                         | 460 (1.62%) | ko05010 |
| 40 | <a href="#">Measles</a>                                     | 456 (1.61%) | ko05162 |
| 41 | <a href="#">Natural killer cell mediated cytotoxicity</a>   | 440 (1.55%) | ko04650 |
| 42 | <a href="#">Cell cycle</a>                                  | 438 (1.54%) | ko04110 |
| 43 | <a href="#">Cytokine-cytokine receptor interaction</a>      | 433 (1.53%) | ko04060 |
| 44 | <a href="#">T cell receptor signaling pathway</a>           | 418 (1.47%) | ko04660 |
| 45 | <a href="#">NF-kappa B signaling pathway</a>                | 416 (1.47%) | ko04064 |
| 46 | <a href="#">Osteoclast differentiation</a>                  | 413 (1.45%) | ko04380 |
| 47 | <a href="#">Pathogenic Escherichia coli infection</a>       | 412 (1.45%) | ko05130 |
| 48 | <a href="#">Dopaminergic synapse</a>                        | 412 (1.45%) | ko04728 |
| 49 | <a href="#">Phosphatidylinositol signaling system</a>       | 408 (1.44%) | ko04070 |
| 50 | <a href="#">Hepatitis C</a>                                 | 401 (1.41%) | ko05160 |
| 51 | <a href="#">Lysine degradation</a>                          | 398 (1.4%)  | ko00310 |
| 52 | <a href="#">Small cell lung cancer</a>                      | 398 (1.4%)  | ko05222 |
| 53 | <a href="#">Prostate cancer</a>                             | 395 (1.39%) | ko05215 |
| 54 | <a href="#">Jak-STAT signaling pathway</a>                  | 394 (1.39%) | ko04630 |
| 55 | <a href="#">Pertussis</a>                                   | 393 (1.38%) | ko05133 |
| 56 | <a href="#">Bacterial invasion of epithelial cells</a>      | 392 (1.38%) | ko05100 |

---

|    |                                                           |             |         |
|----|-----------------------------------------------------------|-------------|---------|
| 57 | <a href="#">Lysosome</a>                                  | 387 (1.36%) | ko04142 |
| 58 | <a href="#">Pancreatic secretion</a>                      | 383 (1.35%) | ko04972 |
| 59 | <a href="#">Melanogenesis</a>                             | 378 (1.33%) | ko04916 |
| 60 | <a href="#">Pyrimidine metabolism</a>                     | 377 (1.33%) | ko00240 |
| 61 | <a href="#">mRNA surveillance pathway</a>                 | 371 (1.31%) | ko03015 |
| 62 | <a href="#">B cell receptor signaling pathway</a>         | 368 (1.3%)  | ko04662 |
| 63 | <a href="#">GnRH signaling pathway</a>                    | 362 (1.28%) | ko04912 |
| 64 | <a href="#">Oocyte meiosis</a>                            | 359 (1.26%) | ko04114 |
| 65 | <a href="#">Salivary secretion</a>                        | 354 (1.25%) | ko04970 |
| 66 | <a href="#">TGF-beta signaling pathway</a>                | 354 (1.25%) | ko04350 |
| 67 | <a href="#">Renal cell carcinoma</a>                      | 352 (1.24%) | ko05211 |
| 68 | <a href="#">Chagas disease (American trypanosomiasis)</a> | 347 (1.22%) | ko05142 |
| 69 | <a href="#">ErbB signaling pathway</a>                    | 346 (1.22%) | ko04012 |
| 70 | <a href="#">Cardiac muscle contraction</a>                | 344 (1.21%) | ko04260 |
| 71 | <a href="#">Protein digestion and absorption</a>          | 343 (1.21%) | ko04974 |
| 72 | <a href="#">Cholinergic synapse</a>                       | 338 (1.19%) | ko04725 |
| 73 | <a href="#">Gastric acid secretion</a>                    | 336 (1.18%) | ko04971 |
| 74 | <a href="#">Vibrio cholerae infection</a>                 | 335 (1.18%) | ko05110 |
| 75 | <a href="#">Gap junction</a>                              | 333 (1.17%) | ko04540 |
| 76 | <a href="#">Neuroactive ligand-receptor interaction</a>   | 322 (1.13%) | ko04080 |
| 77 | <a href="#">NOD-like receptor signaling pathway</a>       | 321 (1.13%) | ko04621 |
| 78 | <a href="#">Long-term potentiation</a>                    | 320 (1.13%) | ko04720 |
| 79 | <a href="#">Fc epsilon RI signaling pathway</a>           | 319 (1.12%) | ko04664 |
| 80 | <a href="#">Chronic myeloid leukemia</a>                  | 319 (1.12%) | ko05220 |
| 81 | <a href="#">Shigellosis</a>                               | 318 (1.12%) | ko05131 |
| 82 | <a href="#">Progesterone-mediated oocyte maturation</a>   | 316 (1.11%) | ko04914 |
| 83 | <a href="#">Alcoholism</a>                                | 315 (1.11%) | ko05034 |
| 84 | <a href="#">Complement and coagulation cascades</a>       | 313 (1.1%)  | ko04610 |
| 85 | <a href="#">Serotonergic synapse</a>                      | 311 (1.1%)  | ko04726 |
| 86 | <a href="#">Leishmaniasis</a>                             | 308 (1.09%) | ko05140 |

---

|     |                                                                        |             |         |
|-----|------------------------------------------------------------------------|-------------|---------|
| 87  | <a href="#">Amyotrophic lateral sclerosis (ALS)</a>                    | 300 (1.06%) | ko05014 |
| 88  | <a href="#">Notch signaling pathway</a>                                | 299 (1.05%) | ko04330 |
| 89  | <a href="#">VEGF signaling pathway</a>                                 | 296 (1.04%) | ko04370 |
| 90  | <a href="#">Glutamatergic synapse</a>                                  | 296 (1.04%) | ko04724 |
| 91  | <a href="#">Hematopoietic cell lineage</a>                             | 293 (1.03%) | ko04640 |
| 92  | <a href="#">Arrhythmogenic right ventricular cardiomyopathy (ARVC)</a> | 293 (1.03%) | ko05412 |
| 93  | <a href="#">Apoptosis</a>                                              | 292 (1.03%) | ko04210 |
| 94  | <a href="#">Adipocytokine signaling pathway</a>                        | 288 (1.01%) | ko04920 |
| 95  | <a href="#">Bile secretion</a>                                         | 286 (1.01%) | ko04976 |
| 96  | <a href="#">Inositol phosphate metabolism</a>                          | 281 (0.99%) | ko00562 |
| 97  | <a href="#">Ribosome biogenesis in eukaryotes</a>                      | 275 (0.97%) | ko03008 |
| 98  | <a href="#">Toll-like receptor signaling pathway</a>                   | 273 (0.96%) | ko04620 |
| 99  | <a href="#">Pancreatic cancer</a>                                      | 265 (0.93%) | ko05212 |
| 100 | <a href="#">Systemic lupus erythematosus</a>                           | 263 (0.93%) | ko05322 |
| 101 | <a href="#">Glioma</a>                                                 | 261 (0.92%) | ko05214 |
| 102 | <a href="#">Colorectal cancer</a>                                      | 258 (0.91%) | ko05210 |
| 103 | <a href="#">Antigen processing and presentation</a>                    | 258 (0.91%) | ko04612 |
| 104 | <a href="#">p53 signaling pathway</a>                                  | 250 (0.88%) | ko04115 |
| 105 | <a href="#">Glycerophospholipid metabolism</a>                         | 248 (0.87%) | ko00564 |
| 106 | <a href="#">Ribosome</a>                                               | 244 (0.86%) | ko03010 |
| 107 | <a href="#">Retrograde endocannabinoid signaling</a>                   | 243 (0.86%) | ko04723 |
| 108 | <a href="#">Peroxisome</a>                                             | 242 (0.85%) | ko04146 |
| 109 | <a href="#">Staphylococcus aureus infection</a>                        | 240 (0.85%) | ko05150 |
| 110 | <a href="#">Legionellosis</a>                                          | 238 (0.84%) | ko05134 |
| 111 | <a href="#">RNA degradation</a>                                        | 236 (0.83%) | ko03018 |
| 112 | <a href="#">mTOR signaling pathway</a>                                 | 235 (0.83%) | ko04150 |
| 113 | <a href="#">PPAR signaling pathway</a>                                 | 232 (0.82%) | ko03320 |
| 114 | <a href="#">Long-term depression</a>                                   | 229 (0.81%) | ko04730 |
| 115 | <a href="#">Parkinson's disease</a>                                    | 224 (0.79%) | ko05012 |
| 116 | <a href="#">Endometrial cancer</a>                                     | 219 (0.77%) | ko05213 |

---

|     |                                                                            |             |         |
|-----|----------------------------------------------------------------------------|-------------|---------|
| 117 | <a href="#">Epithelial cell signaling in Helicobacter pylori infection</a> | 217 (0.76%) | ko05120 |
| 118 | <a href="#">Acute myeloid leukemia</a>                                     | 215 (0.76%) | ko05221 |
| 119 | <a href="#">Rheumatoid arthritis</a>                                       | 212 (0.75%) | ko05323 |
| 120 | <a href="#">GABAergic synapse</a>                                          | 210 (0.74%) | ko04727 |
| 121 | <a href="#">Amino sugar and nucleotide sugar metabolism</a>                | 203 (0.72%) | ko00520 |
| 122 | <a href="#">Morphine addiction</a>                                         | 203 (0.72%) | ko05032 |
| 123 | <a href="#">Non-small cell lung cancer</a>                                 | 201 (0.71%) | ko05223 |
| 124 | <a href="#">Basal cell carcinoma</a>                                       | 197 (0.69%) | ko05217 |
| 125 | <a href="#">RIG-I-like receptor signaling pathway</a>                      | 196 (0.69%) | ko04622 |
| 126 | <a href="#">Prion diseases</a>                                             | 194 (0.68%) | ko05020 |
| 127 | <a href="#">Melanoma</a>                                                   | 192 (0.68%) | ko05218 |
| 128 | <a href="#">Amphetamine addiction</a>                                      | 192 (0.68%) | ko05031 |
| 129 | <a href="#">RNA polymerase</a>                                             | 188 (0.66%) | ko03020 |
| 130 | <a href="#">ABC transporters</a>                                           | 185 (0.65%) | ko02010 |
| 131 | <a href="#">Oxidative phosphorylation</a>                                  | 184 (0.65%) | ko00190 |
| 132 | <a href="#">Mineral absorption</a>                                         | 183 (0.64%) | ko04978 |
| 133 | <a href="#">Autoimmune thyroid disease</a>                                 | 183 (0.64%) | ko05320 |
| 134 | <a href="#">Hedgehog signaling pathway</a>                                 | 181 (0.64%) | ko04340 |
| 135 | <a href="#">Endocrine and other factor-regulated calcium reabsorption</a>  | 180 (0.63%) | ko04961 |
| 136 | <a href="#">Allograft rejection</a>                                        | 179 (0.63%) | ko05330 |
| 137 | <a href="#">Glycolysis / Gluconeogenesis</a>                               | 179 (0.63%) | ko00010 |
| 138 | <a href="#">Starch and sucrose metabolism</a>                              | 176 (0.62%) | ko00500 |
| 139 | <a href="#">Fructose and mannose metabolism</a>                            | 176 (0.62%) | ko00051 |
| 140 | <a href="#">Type II diabetes mellitus</a>                                  | 174 (0.61%) | ko04930 |
| 141 | <a href="#">Carbohydrate digestion and absorption</a>                      | 172 (0.61%) | ko04973 |
| 142 | <a href="#">Aldosterone-regulated sodium reabsorption</a>                  | 169 (0.6%)  | ko04960 |
| 143 | <a href="#">Type I diabetes mellitus</a>                                   | 168 (0.59%) | ko04940 |
| 144 | <a href="#">Arginine and proline metabolism</a>                            | 166 (0.58%) | ko00330 |
| 145 | <a href="#">Cytosolic DNA-sensing pathway</a>                              | 153 (0.54%) | ko04623 |
| 146 | <a href="#">Graft-versus-host disease</a>                                  | 153 (0.54%) | ko05332 |

---



|     |                                                              |             |         |
|-----|--------------------------------------------------------------|-------------|---------|
| 147 | <a href="#">Glycerolipid metabolism</a>                      | 152 (0.54%) | ko00561 |
| 148 | <a href="#">Synaptic vesicle cycle</a>                       | 151 (0.53%) | ko04721 |
| 149 | <a href="#">Bladder cancer</a>                               | 148 (0.52%) | ko05219 |
| 150 | <a href="#">Pyruvate metabolism</a>                          | 146 (0.51%) | ko00620 |
| 151 | <a href="#">Vasopressin-regulated water reabsorption</a>     | 144 (0.51%) | ko04962 |
| 152 | <a href="#">Malaria</a>                                      | 142 (0.5%)  | ko05144 |
| 153 | <a href="#">Thyroid cancer</a>                               | 138 (0.49%) | ko05216 |
| 154 | <a href="#">Basal transcription factors</a>                  | 137 (0.48%) | ko03022 |
| 155 | <a href="#">African trypanosomiasis</a>                      | 135 (0.48%) | ko05143 |
| 156 | <a href="#">Olfactory transduction</a>                       | 134 (0.47%) | ko04740 |
| 157 | <a href="#">Arachidonic acid metabolism</a>                  | 133 (0.47%) | ko00590 |
| 158 | <a href="#">Other types of O-glycan biosynthesis</a>         | 132 (0.47%) | ko00514 |
| 159 | <a href="#">Cysteine and methionine metabolism</a>           | 130 (0.46%) | ko00270 |
| 160 | <a href="#">Propanoate metabolism</a>                        | 129 (0.45%) | ko00640 |
| 161 | <a href="#">Cocaine addiction</a>                            | 128 (0.45%) | ko05030 |
| 162 | <a href="#">Intestinal immune network for IgA production</a> | 128 (0.45%) | ko04672 |
| 163 | <a href="#">Dorso-ventral axis formation</a>                 | 127 (0.45%) | ko04320 |
| 164 | <a href="#">Sphingolipid metabolism</a>                      | 127 (0.45%) | ko00600 |
| 165 | <a href="#">Primary immunodeficiency</a>                     | 124 (0.44%) | ko05340 |
| 166 | <a href="#">Fat digestion and absorption</a>                 | 123 (0.43%) | ko04975 |
| 167 | <a href="#">N-Glycan biosynthesis</a>                        | 122 (0.43%) | ko00510 |
| 168 | <a href="#">Fanconi anemia pathway</a>                       | 120 (0.42%) | ko03460 |
| 169 | <a href="#">Nicotinate and nicotinamide metabolism</a>       | 120 (0.42%) | ko00760 |
| 170 | <a href="#">Nucleotide excision repair</a>                   | 117 (0.41%) | ko03420 |
| 171 | <a href="#">Vitamin digestion and absorption</a>             | 116 (0.41%) | ko04977 |
| 172 | <a href="#">Fatty acid metabolism</a>                        | 114 (0.4%)  | ko00071 |
| 173 | <a href="#">Phototransduction - fly</a>                      | 114 (0.4%)  | ko04745 |
| 174 | <a href="#">Circadian rhythm - mammal</a>                    | 114 (0.4%)  | ko04710 |
| 175 | <a href="#">Drug metabolism - other enzymes</a>              | 113 (0.4%)  | ko00983 |
| 176 | <a href="#">Aminoacyl-tRNA biosynthesis</a>                  | 111 (0.39%) | ko00970 |

---

|     |                                                              |             |         |
|-----|--------------------------------------------------------------|-------------|---------|
| 177 | <a href="#">Glutathione metabolism</a>                       | 110 (0.39%) | ko00480 |
| 178 | <a href="#">Valine, leucine and isoleucine degradation</a>   | 110 (0.39%) | ko00280 |
| 179 | <a href="#">Pentose and glucuronate interconversions</a>     | 109 (0.38%) | ko00040 |
| 180 | <a href="#">Tryptophan metabolism</a>                        | 107 (0.38%) | ko00380 |
| 181 | <a href="#">Metabolism of xenobiotics by cytochrome P450</a> | 106 (0.37%) | ko00980 |
| 182 | <a href="#">Retinol metabolism</a>                           | 106 (0.37%) | ko00830 |
| 183 | <a href="#">Steroid hormone biosynthesis</a>                 | 104 (0.37%) | ko00140 |
| 184 | <a href="#">Proximal tubule bicarbonate reclamation</a>      | 101 (0.36%) | ko04964 |
| 185 | <a href="#">Base excision repair</a>                         | 99 (0.35%)  | ko03410 |
| 186 | <a href="#">Glycine, serine and threonine metabolism</a>     | 97 (0.34%)  | ko00260 |
| 187 | <a href="#">Porphyrin and chlorophyll metabolism</a>         | 96 (0.34%)  | ko00860 |
| 188 | <a href="#">Drug metabolism - cytochrome P450</a>            | 95 (0.33%)  | ko00982 |
| 189 | <a href="#">Galactose metabolism</a>                         | 91 (0.32%)  | ko00052 |
| 190 | <a href="#">Ascorbate and aldarate metabolism</a>            | 91 (0.32%)  | ko00053 |
| 191 | <a href="#">Ether lipid metabolism</a>                       | 90 (0.32%)  | ko00565 |
| 192 | <a href="#">Asthma</a>                                       | 88 (0.31%)  | ko05310 |
| 193 | <a href="#">Alanine, aspartate and glutamate metabolism</a>  | 87 (0.31%)  | ko00250 |
| 194 | <a href="#">Proteasome</a>                                   | 87 (0.31%)  | ko03050 |
| 195 | <a href="#">MAPK signaling pathway - fly</a>                 | 84 (0.3%)   | ko04013 |
| 196 | <a href="#">DNA replication</a>                              | 83 (0.29%)  | ko03030 |
| 197 | <a href="#">Citrate cycle (TCA cycle)</a>                    | 78 (0.27%)  | ko00020 |
| 198 | <a href="#">Phototransduction</a>                            | 76 (0.27%)  | ko04744 |
| 199 | <a href="#">Linoleic acid metabolism</a>                     | 72 (0.25%)  | ko00591 |
| 200 | <a href="#">beta-Alanine metabolism</a>                      | 72 (0.25%)  | ko00410 |
| 201 | <a href="#">Collecting duct acid secretion</a>               | 71 (0.25%)  | ko04966 |
| 202 | <a href="#">Pentose phosphate pathway</a>                    | 71 (0.25%)  | ko00030 |
| 203 | <a href="#">Taste transduction</a>                           | 66 (0.23%)  | ko04742 |
| 204 | <a href="#">Fatty acid elongation</a>                        | 65 (0.23%)  | ko00062 |
| 205 | <a href="#">Glyoxylate and dicarboxylate metabolism</a>      | 64 (0.23%)  | ko00630 |
| 206 | <a href="#">Mismatch repair</a>                              | 64 (0.23%)  | ko03430 |

---

|     |                                                                            |            |         |
|-----|----------------------------------------------------------------------------|------------|---------|
| 207 | <a href="#">Circadian rhythm - fly</a>                                     | 64 (0.23%) | ko04711 |
| 208 | <a href="#">Glycosylphosphatidylinositol(GPI)-anchor biosynthesis</a>      | 62 (0.22%) | ko00563 |
| 209 | <a href="#">Homologous recombination</a>                                   | 60 (0.21%) | ko03440 |
| 210 | <a href="#">Tyrosine metabolism</a>                                        | 60 (0.21%) | ko00350 |
| 211 | <a href="#">Glycosaminoglycan biosynthesis - heparan sulfate</a>           | 59 (0.21%) | ko00534 |
| 212 | <a href="#">Biosynthesis of unsaturated fatty acids</a>                    | 58 (0.2%)  | ko01040 |
| 213 | <a href="#">Regulation of autophagy</a>                                    | 57 (0.2%)  | ko04140 |
| 214 | <a href="#">SNARE interactions in vesicular transport</a>                  | 57 (0.2%)  | ko04130 |
| 215 | <a href="#">Butanoate metabolism</a>                                       | 56 (0.2%)  | ko00650 |
| 216 | <a href="#">Fatty acid biosynthesis</a>                                    | 55 (0.19%) | ko00061 |
| 217 | <a href="#">Histidine metabolism</a>                                       | 55 (0.19%) | ko00340 |
| 218 | <a href="#">Mucin type O-Glycan biosynthesis</a>                           | 55 (0.19%) | ko00512 |
| 219 | <a href="#">Other glycan degradation</a>                                   | 53 (0.19%) | ko00511 |
| 220 | <a href="#">Glycosaminoglycan biosynthesis - chondroitin sulfate</a>       | 53 (0.19%) | ko00532 |
| 221 | <a href="#">Non-homologous end-joining</a>                                 | 53 (0.19%) | ko03450 |
| 222 | <a href="#">alpha-Linolenic acid metabolism</a>                            | 49 (0.17%) | ko00592 |
| 223 | <a href="#">Pantothenate and CoA biosynthesis</a>                          | 49 (0.17%) | ko00770 |
| 224 | <a href="#">Primary bile acid biosynthesis</a>                             | 48 (0.17%) | ko00120 |
| 225 | <a href="#">Glycosaminoglycan degradation</a>                              | 46 (0.16%) | ko00531 |
| 226 | <a href="#">Glycosphingolipid biosynthesis - lacto and neolacto series</a> | 46 (0.16%) | ko00601 |
| 227 | <a href="#">One carbon pool by folate</a>                                  | 44 (0.16%) | ko00670 |
| 228 | <a href="#">Selenocompound metabolism</a>                                  | 43 (0.15%) | ko00450 |
| 229 | <a href="#">Terpenoid backbone biosynthesis</a>                            | 39 (0.14%) | ko00900 |
| 230 | <a href="#">Renin-angiotensin system</a>                                   | 37 (0.13%) | ko04614 |
| 231 | <a href="#">Maturity onset diabetes of the young</a>                       | 37 (0.13%) | ko04950 |
| 232 | <a href="#">Phenylalanine metabolism</a>                                   | 36 (0.13%) | ko00360 |
| 233 | <a href="#">Steroid biosynthesis</a>                                       | 36 (0.13%) | ko00100 |
| 234 | <a href="#">Protein export</a>                                             | 35 (0.12%) | ko03060 |
| 235 | <a href="#">Glycosphingolipid biosynthesis - globo series</a>              | 33 (0.12%) | ko00603 |
| 236 | <a href="#">Glycosaminoglycan biosynthesis - keratan sulfate</a>           | 33 (0.12%) | ko00533 |

---

|     |                                                                     |            |         |
|-----|---------------------------------------------------------------------|------------|---------|
| 237 | <a href="#">Sulfur relay system</a>                                 | 32 (0.11%) | ko04122 |
| 238 | <a href="#">Glycosphingolipid biosynthesis - ganglio series</a>     | 30 (0.11%) | ko00604 |
| 239 | <a href="#">Sulfur metabolism</a>                                   | 28 (0.1%)  | ko00920 |
| 240 | <a href="#">Riboflavin metabolism</a>                               | 27 (0.1%)  | ko00740 |
| 241 | <a href="#">Folate biosynthesis</a>                                 | 27 (0.1%)  | ko00790 |
| 242 | <a href="#">Cyanoamino acid metabolism</a>                          | 27 (0.1%)  | ko00460 |
| 243 | <a href="#">Ubiquinone and other terpenoid-quinone biosynthesis</a> | 25 (0.09%) | ko00130 |
| 244 | <a href="#">Taurine and hypotaurine metabolism</a>                  | 24 (0.08%) | ko00430 |
| 245 | <a href="#">Nicotine addiction</a>                                  | 19 (0.07%) | ko05033 |
| 246 | <a href="#">Synthesis and degradation of ketone bodies</a>          | 14 (0.05%) | ko00072 |
| 247 | <a href="#">Vitamin B6 metabolism</a>                               | 13 (0.05%) | ko00750 |
| 248 | <a href="#">Thiamine metabolism</a>                                 | 12 (0.04%) | ko00730 |
| 249 | <a href="#">D-Glutamine and D-glutamate metabolism</a>              | 11 (0.04%) | ko00471 |
| 250 | <a href="#">D-Arginine and D-ornithine metabolism</a>               | 11 (0.04%) | ko00472 |
| 251 | <a href="#">Phenylalanine, tyrosine and tryptophan biosynthesis</a> | 10 (0.04%) | ko00400 |
| 252 | <a href="#">Butirosin and neomycin biosynthesis</a>                 | 10 (0.04%) | ko00524 |
| 253 | <a href="#">Valine, leucine and isoleucine biosynthesis</a>         | 8 (0.03%)  | ko00290 |
| 254 | <a href="#">Caffeine metabolism</a>                                 | 8 (0.03%)  | ko00232 |
| 255 | <a href="#">Lipoic acid metabolism</a>                              | 7 (0.02%)  | ko00785 |
| 256 | <a href="#">Biotin metabolism</a>                                   | 6 (0.02%)  | ko00780 |
| 257 | <a href="#">Polyketide sugar unit biosynthesis</a>                  | 4 (0.01%)  | ko00523 |
| 258 | <a href="#">Insect hormone biosynthesis</a>                         | 2 (0.01%)  | ko00981 |
| 259 | <a href="#">Lysine biosynthesis</a>                                 | 2 (0.01%)  | ko00300 |

---

Table S4. Summary of the RNA-seq alignment statistics in the two libraries.

| Samples | Raw tags | Distinct tags | Clean tags | Distinct clean tags | Map to gene tags | Unique map to gene tags | Unknown tags   |
|---------|----------|---------------|------------|---------------------|------------------|-------------------------|----------------|
| CG      | 3578555  | 322668        | 3362986    | 119479              | 2623920(78.02%)  | 2328453(69.24%)         | 739066(21.98%) |
| EG      | 3615650  | 316393        | 3404084    | 116890              | 2677430(78.65%)  | 2367148(69.54%)         | 726654(21.35%) |

Table S5. Gene ontology (GO) classification of the significantly differentially expressed genes.

| Gene Ontology term                                                       | Cluster frequency       | Genome frequency of use         | Corrected P-value |
|--------------------------------------------------------------------------|-------------------------|---------------------------------|-------------------|
| <b>Cellular Component</b>                                                | Cluster frequency (200) | Genome frequency of use (21131) |                   |
| extracellular region                                                     | 33 (16.5%)              | 1267 (6.0%)                     | 1.92E-05          |
| extracellular region part                                                | 20 (10.0%)              | 721 (3.4%)                      | 0.0031            |
| extracellular matrix                                                     | 14 (7.0%)               | 417 (2.0%)                      | 0.00801           |
| hemoglobin complex                                                       | 3 (1.5%)                | 9 (0.0%)                        | 0.01163           |
| cytosolic part                                                           | 10 (5.0%)               | 230 (1.1%)                      | 0.01231           |
| cytosolic ribosome                                                       | 6 (3.0%)                | 82 (0.4%)                       | 0.02222           |
| MHC protein complex                                                      | 5 (2.5%)                | 54 (0.3%)                       | 0.02712           |
| proton-transporting two-sector ATPase complex                            | 5 (2.5%)                | 58 (0.3%)                       | 0.03811           |
| <b>Molecular Function</b>                                                | Cluster frequency (210) | Genome frequency of use (22432) |                   |
| cytokine activity                                                        | 6 (2.9%)                | 56 (0.2%)                       | 0.00292           |
| oxygen transporter activity                                              | 3 (1.4%)                | 12 (0.1%)                       | 0.03544           |
| structural molecule activity                                             | 18 (8.6%)               | 730 (3.3%)                      | 0.03959           |
| monocarboxylic acid transmembrane transporter activity                   | 4 (1.9%)                | 31 (0.1%)                       | 0.04083           |
| <b>Biological Process</b>                                                | Cluster frequency (214) | Genome frequency of use (21350) |                   |
| regulation of transcription involved in G1/S phase of mitotic cell cycle | 3 (1.4%)                | 10 (0.0%)                       | 0.010034          |
| response to bacterium                                                    | 11 (5.1%)               | 278 (1.3%)                      | 0.010739          |
| energy coupled proton transport, down electrochemical gradient           | 4 (1.9%)                | 32 (0.1%)                       | 0.025118          |
| ATP synthesis coupled proton transport                                   | 4 (1.9%)                | 32 (0.1%)                       | 0.025118          |
| prostaglandin transport                                                  | 2 (0.9%)                | 3 (0.0%)                        | 0.026434          |
| gas transport                                                            | 3 (1.4%)                | 15 (0.1%)                       | 0.036665          |
| oxygen transport                                                         | 3 (1.4%)                | 15 (0.1%)                       | 0.036665          |
| viral genome expression                                                  | 5 (2.3%)                | 63 (0.3%)                       | 0.037538          |
| viral transcription                                                      | 5 (2.3%)                | 63 (0.3%)                       | 0.037538          |
| translational termination                                                | 5 (2.3%)                | 65 (0.3%)                       | 0.043404          |
| immune response                                                          | 13 (6.1%)               | 440 (2.1%)                      | 0.046614          |
| ATP biosynthetic process                                                 | 7 (3.3%)                | 140 (0.7%)                      | 0.047625          |

Table S6. The significantly enriched KEGG pathways affected by *A. hydrophila* infection.

| Pathway                             | DEGs with pathway annotation (260) | Genes with pathway annotation (28386) | P-value    | Q-value  | Pathway ID |
|-------------------------------------|------------------------------------|---------------------------------------|------------|----------|------------|
| Rheumatoid arthritis                | 11 (4.23%)                         | 212 (0.75%)                           | 4.56E-06   | 0.000428 | ko05323    |
| Antigen processing and presentation | 12 (4.62%)                         | 258 (0.91%)                           | 5.18E-06   | 0.000428 | ko04612    |
| Phagosome                           | 16 (6.15%)                         | 641 (2.26%)                           | 0.00030861 | 0.012821 | ko04145    |
| Oxidative phosphorylation           | 8 (3.08%)                          | 184 (0.65%)                           | 0.00031082 | 0.012821 | ko00190    |
| Type I diabetes mellitus            | 7 (2.69%)                          | 168 (0.59%)                           | 0.00094356 | 0.026215 | ko04940    |
| Lysosome                            | 11 (4.23%)                         | 387 (1.36%)                           | 0.00095326 | 0.026215 | ko04142    |
| Ribosome                            | 8 (3.08%)                          | 244 (0.86%)                           | 0.00193558 | 0.045624 | ko03010    |

Note: Only the Q-values for pathways considered as significantly enriched (Q-value < 0.05) were shown in the table.

Table S7. The sequences of oligonucleotide primer pairs used in quantitative real-time PCR (qPCR).

| Gene names     | Upstream primers                   | Downstream primers                |
|----------------|------------------------------------|-----------------------------------|
| IL-8           | qIL8F: GCTGCTAGACTGTTTGCTCCAC      | qIL8R: GAGGCAGGTCTGTCCTTGTTTC     |
| MHC I          | qMHCF: TGGAGCAGCGGCAAACACTAC       | qMHCR: TTGGGTAGAATCCTGTGGCA       |
| CCR4           | qCCRF: ATGGTAGGGAAACATCGCACT       | qCCRR: GCAGAAATACAAGCGAGCGA       |
| CXCL12         | qCXCLF: GCTCAAGTTCCTCCACACACC      | qCXCLR: GACGGTGGGCTGTCAGATTC      |
| CCL25          | qCCLF: TAACTAAACAGAGGAGGAGACATAAGC | qCCLR: CAGTTTTTCATAGGAACCTTGTGC   |
| ATP1A4         | qATPF: GTTCTTCTTTGCCATTCGTTTG      | qATPR: AGCACTTCATCCACATCATCACT    |
| ELA2           | qELAF: GTCAAGGAATCTATGGTCTGTGC     | qELAR: GGACACACGGGTAAAGACAGTAG    |
| RRM2           | qRRMF: TTGGTGGAACGATTTACTCAGG      | qRRMR: ACAAGGCATTGTCTCAATAGCA     |
| PRSS           | qPRSSF: ATGGTATTGTGTCCTGGGGTT      | qPRSSR: TTAGTTGCTGCTTATGGTGTCG    |
| PLA2           | qPLAF: CCCTACAGCAATCCCACCTC        | qPLAR: TTGGCTCTCACGCAATCTTC       |
| CTSK           | qCTSKF: TTACGGAGTCACACCGAAAGG      | qCTSKR: TTACGAGCCATCAGGACATAACC   |
| RASA1          | qRASAF: CAAACGCTTGTTGAATGTGGT      | qRASAR: CAGATTGTGATTCAGCACTTTAGC  |
| LASP1          | qLASPF: CGTTTCTTCACCTTATTCCTTCG    | qLASPR: CAGTATGGTCTCTTCTCAAAGCCTT |
| CD21           | qCDF: CAATGCCACACTACTGTCCTACC      | qCDR: GACCCATAGAGACGGTATCCACT     |
| SERCA          | qSERCAF: AGCGACAGCAACTCCAATAGC     | qSERCAR: GATGCTGTCCCCGACCTTAG     |
| IL-6           | qIL6F: CAACGACATCAAACACGAGACC      | qIL6R: TGTCCACCCTTCCTCTTGCT       |
| IL-10          | qIL10F: GGATGTTGCTGTGGATTGGA       | qIL10R: TGCCTTATCCTACAGTATGTGGTT  |
| IL10R $\alpha$ | q10RAF: TCCGTGTGAAAGTGGAGATGAC     | q10RAR: GGATTCAGAACAGCAGGCAT      |



|                 |                                  |                                  |
|-----------------|----------------------------------|----------------------------------|
| IL10R $\beta$   | q10RBF: ACTGACAGCAGCAGGGAGAAG    | q10RBR: AGCAGAACCGAAAGAAAGCC     |
| IL-12p40        | qp40F: AGGAGCATCAATCTCACTCTGTTC  | qp40R: GCCACTCAAATACATCATCTTCG   |
| IL12R $\beta$ 2 | q12RBF: CTCTTGAGGGATTTTCAGACCATT | q12RBR: CACACATTAGAGGCATCTCCACA  |
| IL-17R          | qIL17RF: TCTCTGGCTGGACTCTTGGAT   | qIL17RR: GAGGAGGATGTGAGAGGAGAAAC |
| IL2RG           | qIL2RGF: GGTTGGAGAGGATGCTTTCAC   | qIL2RGR: GCCTGTCCTGTGCGTGAGTA    |
| IL-22           | qIL22F: GTCGTGTTTCGTGGTCTTTGTC   | qIL22R: TGTGCTGCTGGTGCTTTCTG     |
| IL-17A/F1       | qAF1F : GGACCTACACGTTTACGCATG    | qAF1R: ACAGGTAATCCTCACTGCCATC    |
| IL-17D          | q17DF: ACCTGTCAATCAGCGTCTCG      | q17DR: CTGGATCATGGGAGATTCTGTAC   |
| IL23R           | q23RF: GCCGATGATTCCAAC TATTTACAC | q23RR: TGACCTGTGTTGAAGACAGACTCT  |
| $\beta$ -actin  | actF: CCTTCTTGGGTATGGAGTCTTG     | actR: AGAGTATTTACGCTCAGGTGGG     |

Notes: IL-8: interleukin-8; MHC I: major histocompatibility complex, class I; CCR4: chemokine (C-C motif) receptor 4; CXCL12: chemokine (C-X-C motif) ligand 12; CCL25: chemokine (C-C motif) ligand 25 $\beta$ ; ATP1A4: Na<sup>+</sup>/K<sup>+</sup> transporting ATPase subunit  $\alpha$ -4; ELA2: pancreatic elastase II; RRM2: ribonucleoside-diphosphate reductase subunit M2; PRSS: trypsinogen; PLA2: phospholipase A2; CTSK: cathepsin K; RASA1: RasGTPase-activating protein 1; LASP1: LIM and SH3 protein 1; CD21: cluster of differentiation 21; SERCA: Sarco (endo) plasmic reticulum calcium ATPase; IL-6: interleukin-6; IL-10: interleukin-10; IL10RA: interleukin-10 receptor  $\alpha$ ; IL10RB: interleukin-10 receptor  $\beta$ ; IL-12p40: interleukin-12 p40; IL12RB2: interleukin-12 receptor  $\beta$ -2; IL17R: interleukin-17 receptor; IL-17A/F1: interleukin-17A/F1; IL2RG: interleukin-2 receptor  $\gamma$ ; IL-22: interleukin-22; IL-17D: interleukin-17D; IL-23R: interleukin-23 receptor.

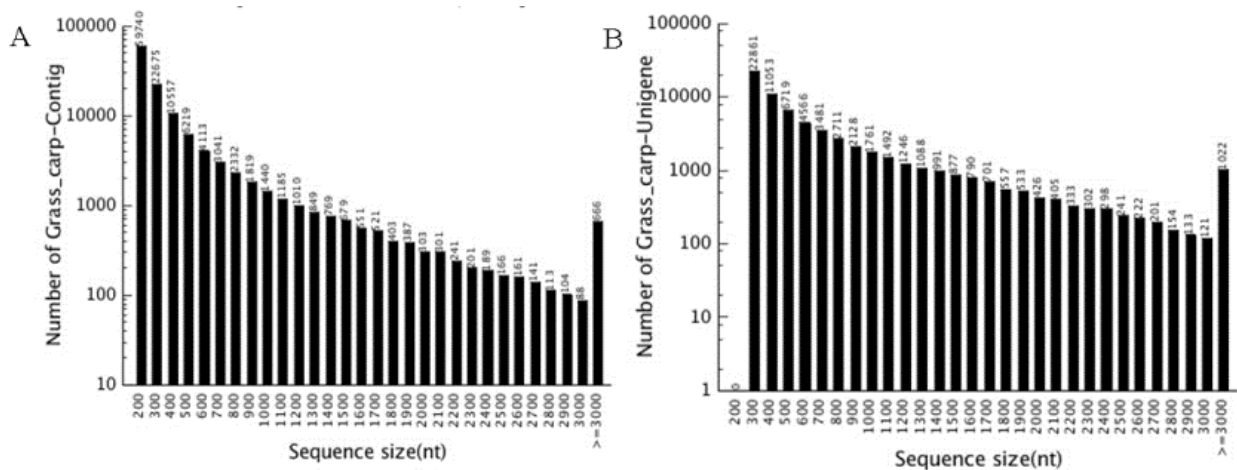

Figure S1. The size distribution of assembled contigs (A) and unigenes (B) from the grass carp transcriptome.

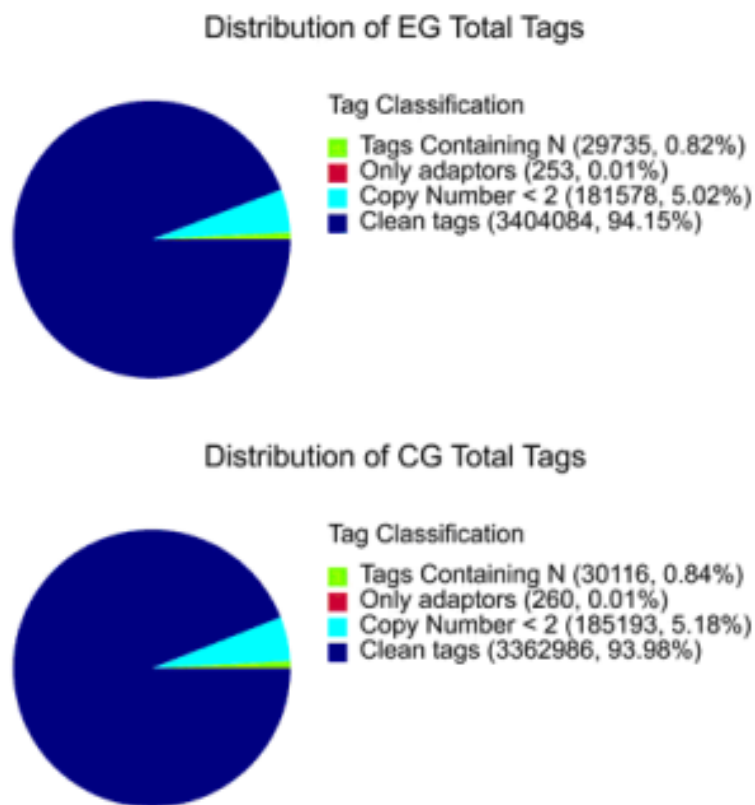

Figure S2. Distribution of total clean tags from DGE libraries.

The numbers (and the percentage in parentheses) indicate each tag class (including tags containing N, empty tags with the adaptor only, tags with a copy number < 2, and clean tags) number out of the total number of tags. Data from the experimental group (top) and control group (bottom) are shown.

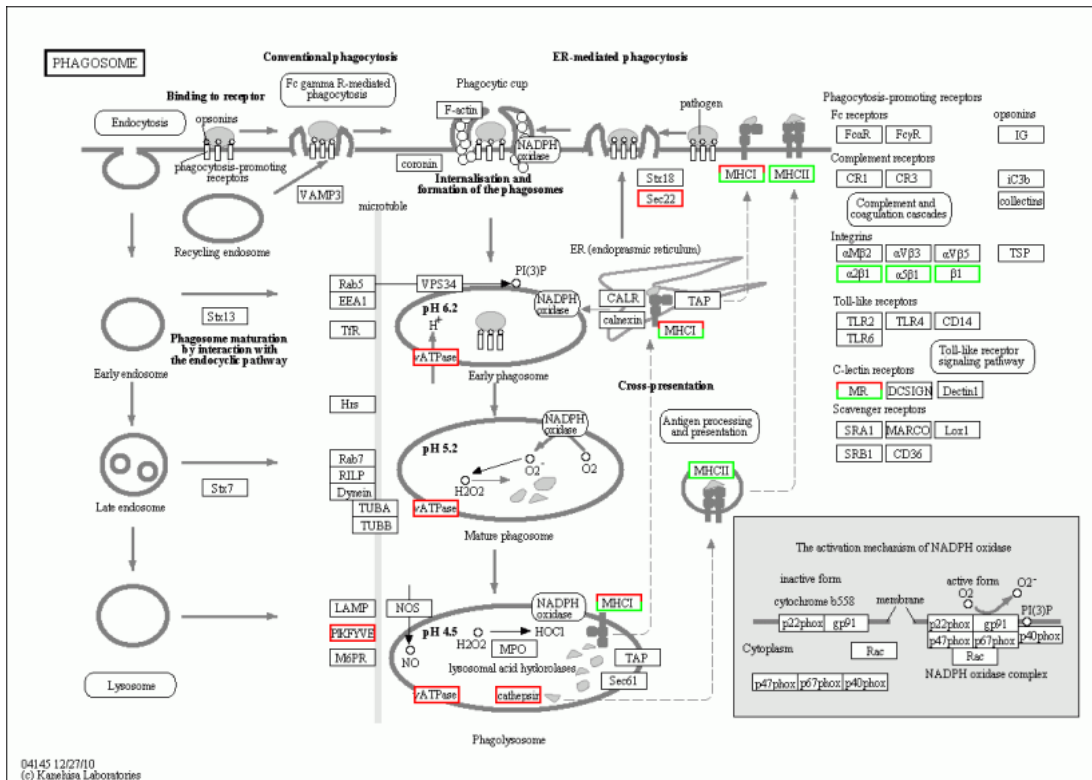

Figure S3. The significantly DEG-enriched KEGG phagosome pathway.

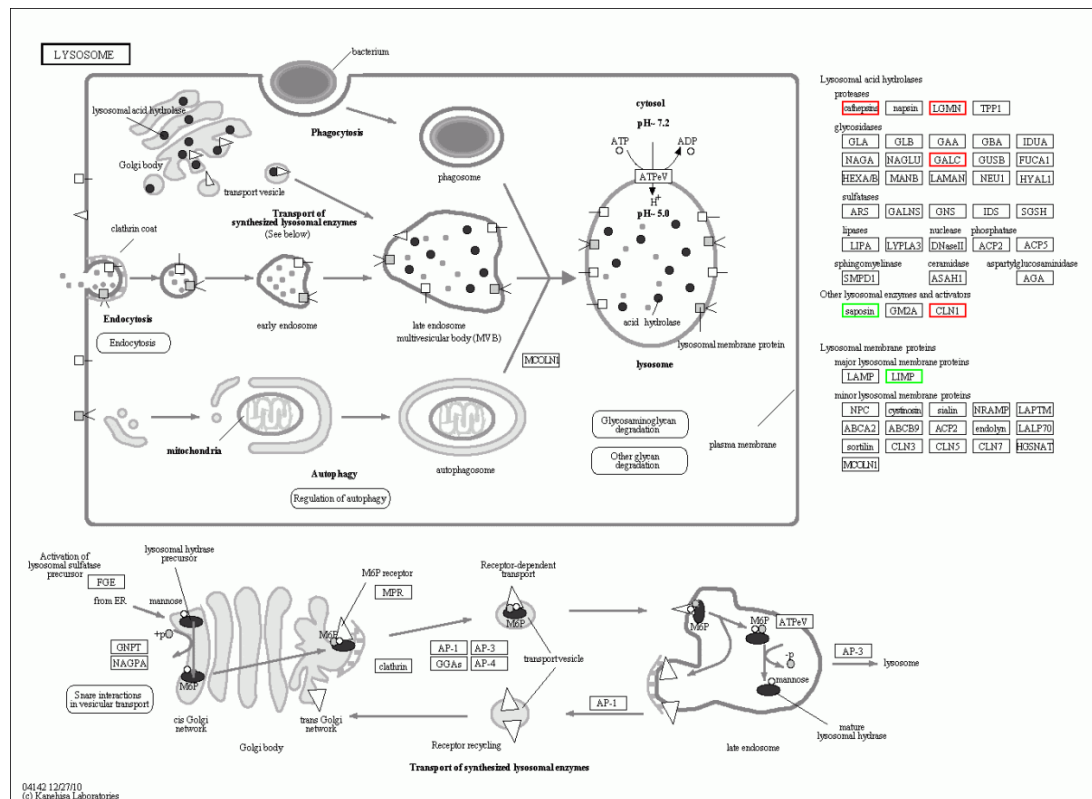

Figure S4. The significantly DEG-enriched KEGG lysosome pathway.

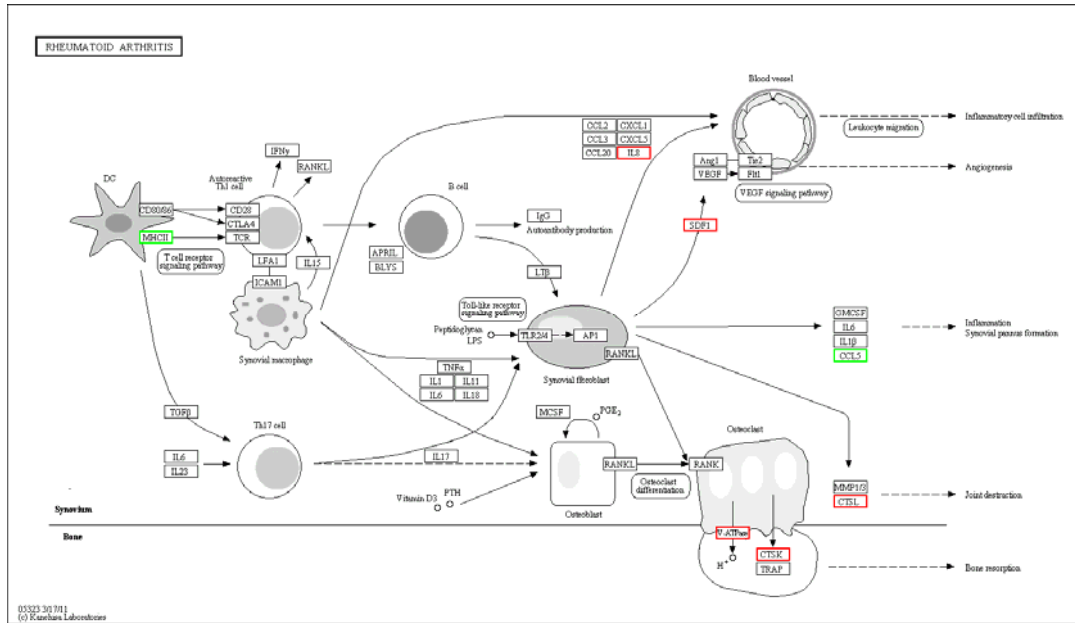

Figure S5. The significantly DEG-enriched KEGG rheumatoid arthritis pathway.

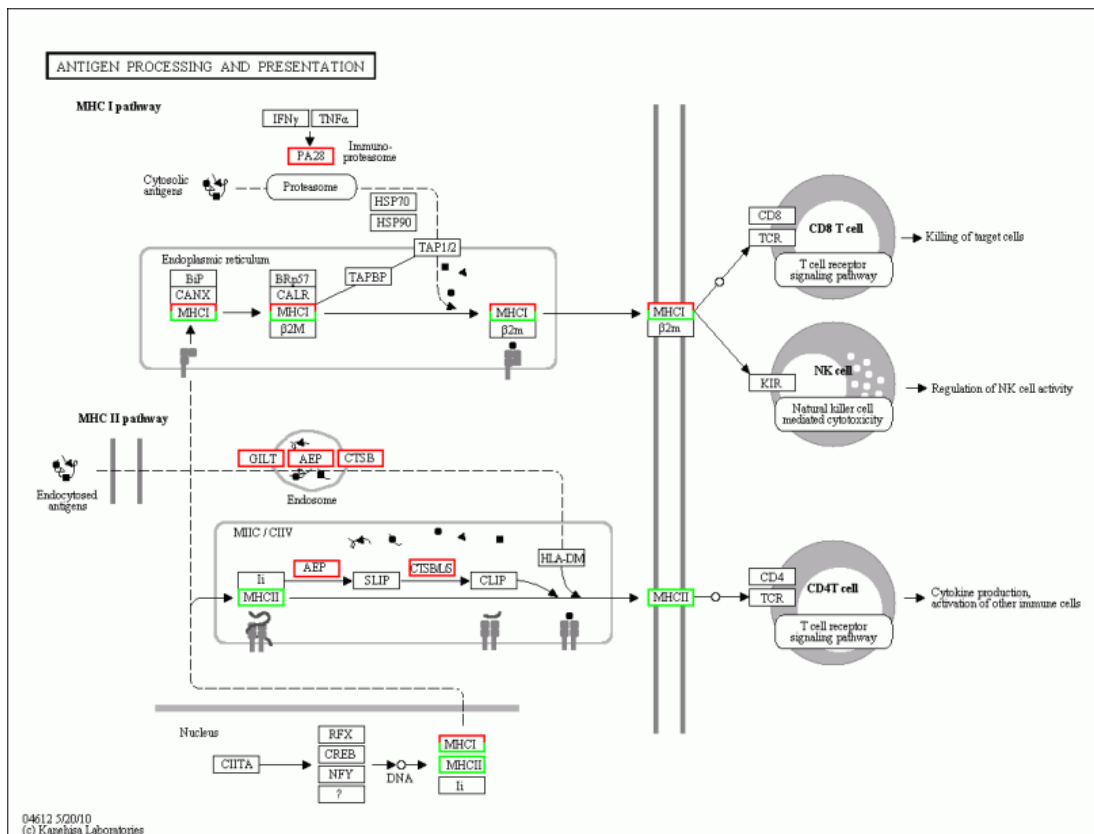

Figure S6. The significantly DEG-enriched KEGG antigen processing and presentation pathway.

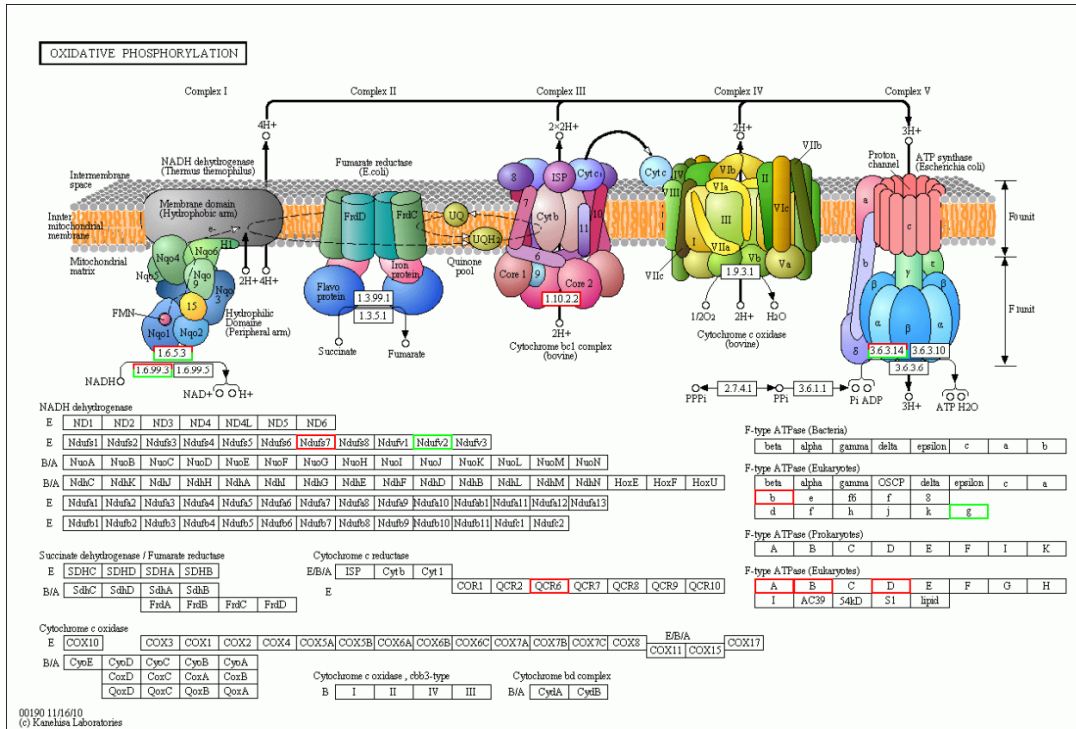

Figure S7. The significantly DEG-enriched KEGG oxidative phosphorylation pathway.

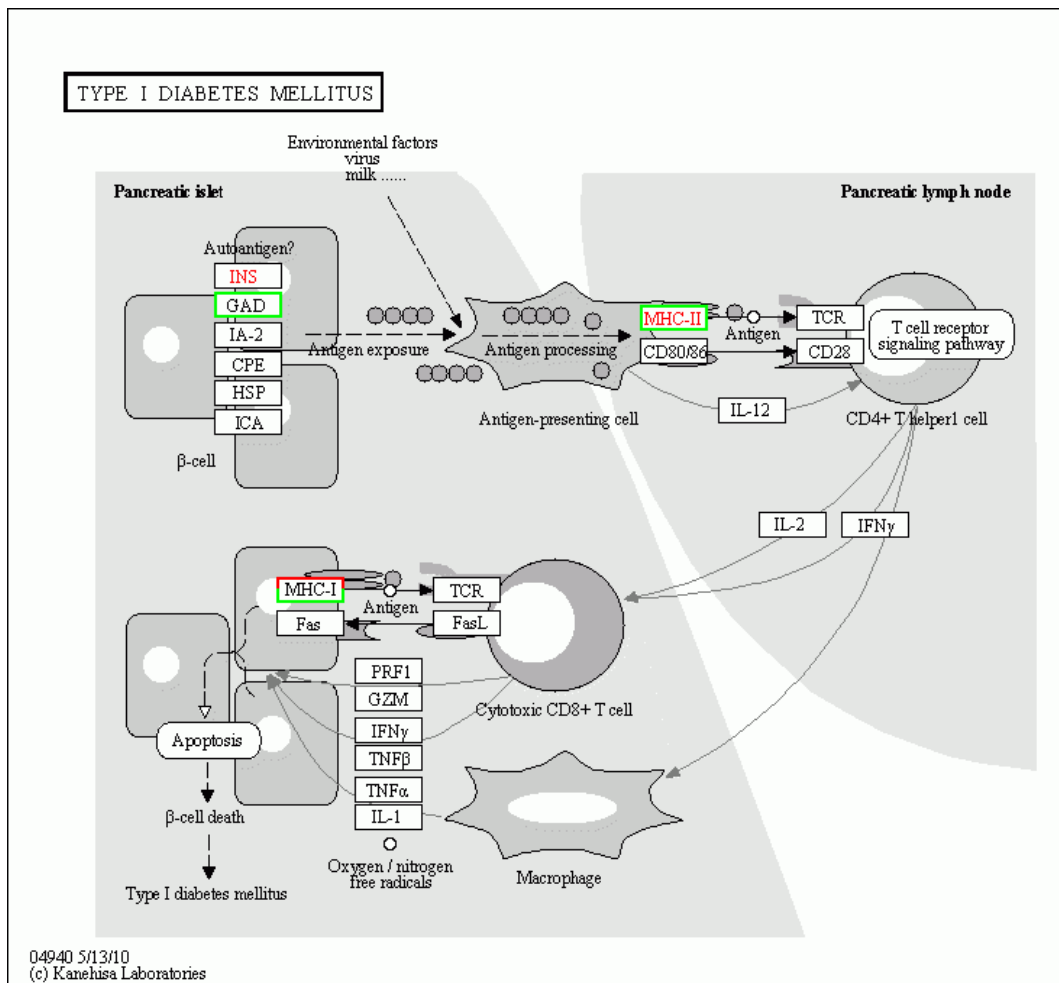

Figure S8. The significantly DEG-enriched KEGG type I diabetes mellitus pathway.

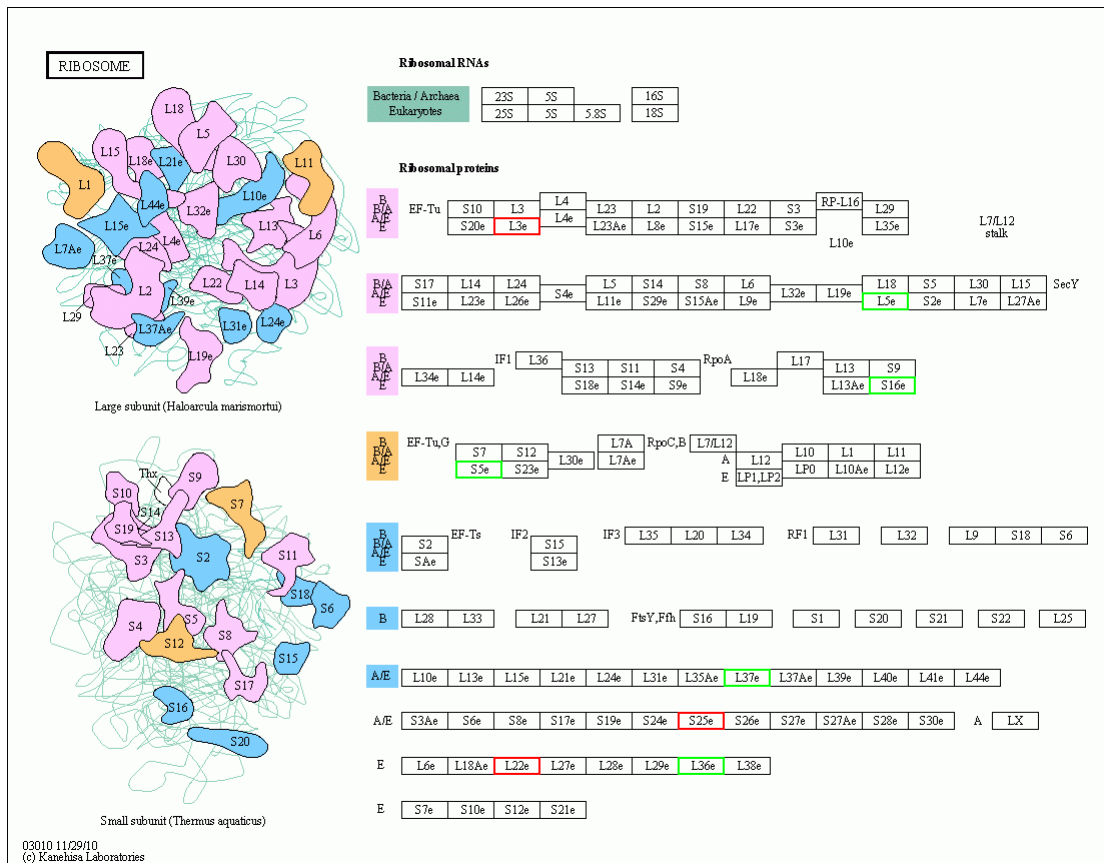

Figure S9. The significantly DEG-enriched KEGG ribosome pathway.
